# Supplementary material
Source: publisher site journal article supplement (https://www.dovepress.com/article/318460)
Supplement: Supplementary file 1 [file get_supplementary_file.php]

Supplementary files: A long-term pilot study of Mindfulness-Based Cognitive Therapy for subjective well-being among healthy individuals in comparison with clinical samples

**Clinical outcomes reported in the table 4, 5, and 6**

**-Primary outcome-**

the 5-item World Health Organization Well-Being Index (WHO-5): WHO-5 is one of the most widely used questionnaires for assessing affective aspect of subjective well-being.1 It is a 5-item questionnaire. Scores on the scale should be between 0 and 25. Higher scores indicate a higher level of affective aspect of well-being. Validity and reliability were endorsed by Awata et al. 2, which indicates that the scale fits to the unidimensional structure (Cronbach’s α= 0.87; Loevinger’s coefficient of homogeneity= 0.64). The original English version of the WHO-5 was adapted (in collaboration with the European WHO office) to suit Japanese through a process of two independent forward and backward translations, linguistic panels, pilot testing, and formal assessment of its internal and external validity. The final version was tested in a pilot study, which confirmed a high level of item acceptability and comprehension 2.

**-secondary outcomes-**

Satisfaction with Life Scale (SWLS): The SWLS has 5 questions. The scale focuses on assessing one’s life satisfaction, which is cognitive aspect of subjective well-being. Scores on the scale range from 5 to 35. Higher scores indicate higher level of cognitive aspect of well-being. 3 Validity and reliability of the Japanese version scale have been confirmed by Kadono 4. This scale is considered to fit to unidimensional structure based on the result by Kadono (test-retest reliability coefficient was 0.80).

Five Facet Mindfulness Questionnaire (FFMQ): The FFMQ is a scale to assess an individual’s mindfulness skills. It asks respondents to indicate their level of agreement with a series of 39 statements about their general tendency to be mindful during daily life experiences. 3 Scores range from 39 to 195. Higher scores indicate higher mindfulness abilities. With respect to the Japanese version, Sugiura et al 5 confirmed its validity and reliability. Factor analysis indicated that five- factor structure remains in the Japanese version same as in the original version. Cronbach’s α of the total FFMQ (α=0.80) and five subscale scores (αs=0.67-0.85) indicate good reliability.

**Clinical outcomes not reported in the table 4, 5, and 6**

The secondary clinical outcomes except SWLS and FFMQ were as follows. All measures are self-reported questionnaires and have been validated in the Japanese population. 6-15

16-item Quick Inventory of Depressive Symptomatology (QIDS): The QIDS is one of the most widely used 16-item questionnaires for assessing depressive symptoms. 16 The total score is in the range of 0 to 27. Higher scores represent increased depression.

7-item Generalized Anxiety Disorder scale (GAD-7): A 7-item questionnaire that asks patients how often they were bothered by each symptom during the last two weeks. Scores on the scale range from 0 to 21.17 Higher scores represent higher levels of anxiety symptoms.

Connor Davidson Resilience Scale (CDRISC): The CDRISC was developed as a brief assessment to help quantify resilience.18 The scale contains 25 items, all of which carry a 5-point range of responses, pertaining to how the subject has felt over the past month. Total score is in the range of 0 to 100, with higher scores indicating greater resilience.

Perceived Stress Scale (PSS): The PSS is designed to measure the degree to which situations in one’s life are appraised as stressful.19, 20 This scale contains 10 items and assesses perceived stressful experiences or stress responses over the previous month. Total score is in the range of 0 to 40. Higher scores indicate higher stress levels.

Rosenberg Self Esteem Scale (RSES): The RSES was developed as a brief assessment to rate self-esteem, self-worth, acceptability, and confidence. 21 It comprises 10 items that allow four responses on a Likert scale. Total score is in the range of 10 to 40. Higher scores indicate higher self-esteem.

Multidimensional Assessment of Interoceptive Awareness (MAIA): Interoceptive awareness has been regarded as an essential factor in meditation and stress reduction.22 The MAIA was developed as an instrument for experimental interoception research and for the assessment of mind-body therapies.23 It is a 32-item instrument that measures interoceptive awareness on eight dimensions. Total scores for each dimension are in the range of 0 to 5.

5-level EuroQol-5 Dimensions questionnaire (EQ-5D-5L): The EQ-5D-5L is a standard scale for measuring health outcomes and quality of life. It is a simple questionnaire containing 5-item about health-related quality of life.24 Total score is in the range of 0 to 1. Higher scores indicate better quality of life.

World Health Organization Heath and Work Performance Questionnaire (WHO-HPQ): The WHO-HPQ is an instrument designed to estimate the workplace costs of health problems in terms of self-reported sickness absence and reduced job performance (presenteeism). This scale contains 2 items and assesses job performance during the past 4 weeks. Each item is rated on a 10-point Likert scale from 0 (“the worst job performance anyone could have at your job”) to 10 (“the performance of a top worker”). 25 Absolute presenteeism is a tenfold increase in the former item’s score (range from 0 to 100). Relative presenteeism is the score of the former divided by the score of the latter (range from 0.25 to 2.0). Higher scores indicate a higher rating for work performance.

Self-Compassion Scale (SCS): The SCS assesses people’s ability to be kind and understanding toward themselves, as opposed to harsh and self-critical, in instances of pain or failure.26 It consists of 29 items and generates scores on five subscales (self-kindness, self-judgment, common humanity, isolation, mindfulness, and over-identification) that are computed as the mean of each subscale’s item scores. The sum of the subscales is the total SCS scale score. Its range is from 5 to 30, with higher scores indicating more self-compassion.

**REFFERENCES**

1. Mastering depression in primary care (World Health Organization, Regional Office for Europe, Psychiatric Research Unit, Frederiksborg General Hospital) (1998).

2. Awata S, Bech P, Koizumi Y, et al. Validity and utility of the Japanese version of the WHO-Five Well-Being Index in the context of detecting suicidal ideation in elderly community residents. *Int Psychogeriatr*. Feb 2007;19(1):77-88. doi:10.1017/S1041610206004212

3. Diener E, Emmons RA, Larsen RJ, Griffin S. The Satisfaction With Life Scale. *J Pers Assess*. 1985;49(1):71-75.

4. Kadono T. Development and validation of the Japanese version of the Satisfaction With Life Scale *Japanese association of educational psychology (in Japanese)*. 1994;36:192. doi:doi:10.20587/pamjaep.36.0_192

5. Sugiura Y, Sato A, Ito Y, Murakami H. Development and Validation of the Japanese Version of the Five Facet Mindfulness Questionnaire. *Mindfulness*. 2012;3:85-94. doi:DOI 10.1007/s12671-011-0082-1

6. Mimura C, Griffiths P. A Japanese version of the Rosenberg Self-Esteem Scale: translation and equivalence assessment. *J Psychosom Res*. May 2007;62(5):589-94. doi:10.1016/j.jpsychores.2006.11.004

7. Mimura C, Griffiths P. A Japanese version of the Perceived Stress Scale: cross-cultural translation and equivalence assessment. *BMC Psychiatry*. Sep 30 2008;8:85. doi:10.1186/1471-244X-8-85

8. Mimura C, Griffiths P. A Japanese version of the perceived stress scale: translation and preliminary test. *Int J Nurs Stud*. May 2004;41(4):379-85. doi:10.1016/j.ijnurstu.2003.10.009

9. Arimitsu K. Development and validation of the Japanese version of the Self-Compassion Scale

. *The Japanese journal of psychology*. Apr 2014;85(1):50-9 (in Japanese).

10. Shoji M, Mehling WE, Hautzinger M, Herbert BM. Investigating Multidimensional Interoceptive Awareness in a Japanese Population: Validation of the Japanese MAIA-J. *Front Psychol*. 2018;9:1855. doi:10.3389/fpsyg.2018.01855

11. Tsuchiya A, Ikeda S, Ikegami N, et al. Estimating an EQ-5D population value set: the case of Japan. *Health Econ*. Jun 2002;11(4):341-53. doi:10.1002/hec.673

12. Suzuki T, Miyaki K, Sasaki Y, et al. Optimal cutoff values of WHO-HPQ presenteeism scores by ROC analysis for preventing mental sickness absence in Japanese prospective cohort. *PLoS One*. 2014;9(10):e111191. doi:10.1371/journal.pone.0111191

13. Ito M, Nakajima, S., Shirai, A., Kim, Y. Reliability and validity of Japanese version Conner Davidson resilience scale: Consideration for general adults and university students. 2009:

14. Fujisawa D, Nakagawa A, Tajima M, et al. Cross-cultural adaptation of the Quick inventory of depressive symptomatology, self-report (QIDS-SR). *Japanese Jornal of Stress Sciensce*. 2010;25(1):43-52 (in Japanese).

15. Muramatsu K, Miyaoka H, Ueshima K, et al. Validation and utility of a Japanese version of the GAD-7 *Japanese Journal of Psychosomatic Medicine*. 2010;50(6):592 (in Japanese).

16. Rush AJ, Trivedi MH, Ibrahim HM, et al. The 16-item Quick Inventory of Depressive Symptomatology (QIDS), clinician rating (QIDS-C), and self-report (QIDS-SR): A psychometric evaluation in patients with chronic major depression. Article. *Biol Psychiatry*. Sep 2003;54(5):573-583. doi:10.1016/s0006-3223(02)01866-8

17. Spitzer RL, Kroenke K, Williams JBW, Lowe B. A brief measure for assessing generalized anxiety disorder - The GAD-7. Article. *Arch Intern Med*. May 2006;166(10):1092-1097. doi:10.1001/archinte.166.10.1092

18. Connor KM, Davidson JR. Development of a new resilience scale: the Connor-Davidson Resilience Scale (CD-RISC). *Depress Anxiety*. 2003;18(2):76-82. doi:10.1002/da.10113

19. Cohen S, Kamarck T, Mermelstein R. A global measure of perceived stress. *J Health Soc Behav*. Dec 1983;24(4):385-96.

20. Cohen S. Perceived stress in a probability sample of the United States. In: Spacapan S, Oskamp S, Spacapan S, Oskamp S, eds. *The social psychology of health*. Sage Publications, Inc; 1988:31-67. *The Claremont Symposium on Applied Social Psychology*.

21. Rosenberg M. *Society and the adolescent self-image*. Princeton University Press

; 1965.

22. Bornemann B, Herbert BM, Mehling WE, Singer T. Differential changes in self-reported aspects of interoceptive awareness through 3 months of contemplative training. *Frontiers in Psychology*. Jan 2015;51504. doi:10.3389/fpsyg.2014.01504

23. Mehling WE, Price C, Daubenmier JJ, Acree M, Bartmess E, Stewart A. The Multidimensional Assessment of Interoceptive Awareness (MAIA). *PLoS ONE*. 11/01

06/01/received

09/24/accepted 2012;7(11):e48230. doi:10.1371/journal.pone.0048230

24. Herdman M, Gudex C, Lloyd A, et al. Development and preliminary testing of the new five-level version of EQ-5D (EQ-5D-5L). *Quality of Life Research*. Dec 2011;20(10):1727-1736. doi:10.1007/s11136-011-9903-x

25. Kessler RC, Barber C, Beck A, et al. The World Health Organization Health and Work Performance Questionnaire (HPQ). *J Occup Environ Med*. Feb 2003;45(2):156-74. doi:10.1097/01.jom.0000052967.43131.51

26. Neff KD. The development and validation of a scale to measure self-compassion. *Self and Identity*. 2003;2(3):223-250. doi:10.1080/15298860309027

**Table S1.** Secondary Clinical Outcomes except SWLS and FFMQ (mean (SD)) at Each Assessment Point with Comparison to Baseline (healthy individuals)

|  | Time | | | | |
| --- | --- | --- | --- | --- | --- |
|  | T1 | T2 | T3 | T4 | T5 |
| Scales | Baseline | 4 week | 8 week | 20 week | 32 week |
| QIDS | 2.0 (1.0) | 2.8 (2.4) | 2.0 (1.2) | 2.4 (1.3) | 2.4 (2.3) |
| *P* value |  | 0.28 | 0.95 | 0.44 | 0.41 |
| GAD7 | 1.6 (1.7) | 2.1 (2.2) | 1.8 (2.5) | 2.7 (2.5) | 1.1 (1.2) |
| *P* value |  | 0.67 | 0.63 | 0.39 | 0.41 |
| CDRISC | 67.8 (8.3) | 69.4 (11.2) | 69.5 (9.9) | 72.5 (12.2) | 71.3 (11.2) |
| *P* value |  | 0.49 | 0.66 | 0.16 | 0.20 |
| PSS | 13.1 (3.7) | 14.8 (5.2) | 13.3 (3.7) | 15.4 (3.2) | 12.5 (4.1) |
| *P* value |  | 0.19 | 0.95 | 0.06 | 0.69 |
| RSES | 28.5 (5.1) | 28.8 (4.7) | 29.6 (4.4) | 28.9 (4.0) | 29.1 (5.5) |
| *P* value |  | 0.63 | 0.19 | 0.77 | 0.14 |
| EQ-5D-5L utility | 0.95 (0.84) | 0.93 (0.10) | 0.96 (0.85) | 0.86 (0.14) | 0.97 (0.1) |
| *P* value |  | 0.87 | 0.63 | 0.16 | 0.52 |
| HPQ (absolute presenteeism) | 59.2 (21.9) | 61.8 (16.0) | 67.0 (17.7) | 63.0 (20.6) | 71.0 (16.6) |
| *P* value |  | 0.14 | 0.46 | 0.94 | 0.23 |
| SCS (total) | 21.1 (2.2) | 20.7 (3.2) | 22.3 (2.5) | 21.8 (3.0) | 22.3 (3.0) |
| *P* value |  | 0.60 | 0.07 | 0.45 | 0.04 |
| SCS (Self-Kindness) | 4.2 (0.7) | 4.0 (0.5) | 4.5 (0.8) | 4.4 (0.7) | 4.4 (0.6) |
| *P* value |  | 0.08 | 0.22 | 0.52 | 0.13 |
| SCS (Self-Judgment) | 3.5 (0.8) | 3.5 (1.0) | 3.6 (1.0) | 3.5 (1.2) | 3.7 (0.9) |
| *P* value |  | 0.87 | 0.57 | 0.82 | 0.04 |
| SCS (Common Humanity) | 3.3 (0.8) | 3.0 (0.6) | 3.3 (0.6) | 3.2 (0.6) | 3.4 (0.6) |
| *P* value |  | 0.20 | 0.96 | 0.76 | 0.65 |
| SCS (Isolation) | 3.5 (1.1) | 3.5 (1.0) | 3.9 (1.2) | 3.9 (1.1) | 3.7 (1.2) |
| *P* value |  | 0.92 | 0.09 | 0.01* | 0.48 |
| SCS (Mindfulness) | 3.69 (0.6) | 3.6 (0.5) | 3.9 (0.6) | 3.8 (0.6) | 3.8 (0.6) |
| *P* value |  | 0.58 | 0.20 | 0.48 | 0.49 |
| SCS (Over-Identified) | 2.9 (0.7) | 3.1 (1.0) | 3.1 (0.8) | 3.1 (0.9) | 3.3 (1.0) |
| *P* value |  | 0.92 | 0.09 | 0.01* | 0.48 |

**(Continued) Table S1.** Secondary Clinical Outcomes except SWLS and FFMQ (mean (SD)) at Each Assessment Point with Comparison to Baseline (healthy individuals)

|  |  |  |  |  |  |
| --- | --- | --- | --- | --- | --- |
|  | Time | | | | |
|  | T1 | T2 | T3 | T4 | T5 |
| Scales | Baseline | 4 week | 8 week | 20 week | 32 week |
| MAIA (Noticing) | 3.4 (0.6) | 3.6 (0.5) | 3.5 (0.3) | 3.8 (0.4) | 3.7 (0.6) |
| *P* value |  | 0.02* | 0.35 | 0.01* | 0.05 |
| MAIA (Not-Distracting) | 3.3 (1.2) | 2.7 (0.8) | 3.2 (1.0) | 2.9 (0.9) | 3.3 (0.9) |
| *P* value |  | 0.13 | 0.85 | 0.26 | 0.73 |
| MAIA (Not-Worrying) | 2.9 (0.8) | 2.7 (0.9) | 3.3 (0.9) | 3.0 (0.9) | 2.8 (0.6) |
| *P* value |  | 0.57 | 0.14 | 0.66 | 0.97 |
| MAIA (Attention Regulation) | 3.2 (0.6) | 3.3 (0.5) | 3.6 (0.5) | 3.6 (0.5) | 3.6 (0.5) |
| *P* value |  | 0.73 | 0.05 | 0.06 | 0.07 |
| MAIA (Emotional Awareness) | 3.6 (0.6) | 3.6 (0.3) | 3.7 (0.5) | 3.7 (0.3) | 3.7 (0.4) |
| *P* value |  | 0.73 | 0.42 | 0.21 | 0.26 |
| MAIA (Self-Regulation) | 3.5 (0.6) | 3.6 (0.6) | 3.9 (0.2) | 3.9 (0.5) | 3.9 (0.6) |
| *P* value |  | 0.41 | 0.06 | 0.08 | 0.03 |
| MAIA (Body Listening) | 2.8 (0.9) | 3.3 (0.8) | 3.6 (0.4) | 3.5 (0.5) | 3.7 (0.7) |
| *P* value |  | 0.10 | 0.03 | 0.02 | <0.01* |
| MAIA (Trusting) | 3.7 (0.5) | 3.8 (0.8) | 3.9 (0.6) | 3.8 (0.8) | 3.6 (0.8) |
| *P* value |  | 0.90 | 0.51 | 0.90 | 0.29 |

All outcomes were analyzed on the basis of intent-to-treat, using a mixed-effects model repeated-measures approach.

Abbreviation: CD-RISC, the Connor-Davidson Resilience Scale; EQ-5D-5L, Five level EuroQoL-5 Dimensions; GAD7, Generalized Anxiety Disorder Questionnaire; MAIA, The Multidimensional Assessment of Interoceptive Awareness; PSS, Perceived Stress Scale; QIDS: Quick Inventory of Depressive Symptomatology; RSES, Rosenberg Self Esteem Scale; SCS: Self-Compassion Scale; HPQ, The World Health Organization Heath and Work Performance Questionnaire

*P value is less than .0125 (set by Bonferroni correction (.05/4))

**Table S2.** Secondary Clinical Outcomes except SWLS and FFMQ (mean (SD)) at Each Assessment Point with Comparison to Baseline (people with common mental disorders)

|  | Time | | | | |
| --- | --- | --- | --- | --- | --- |
|  | T1 | T2 | T3 | T4 | T5 |
| Scales | Baseline | 4 week | 8 week | 20 week | 32 week |
| GAD7 | 9.9 (3.8) | 7.3 (4.5) | 5.8 (1.8) | 7.4 (4.2) | 3.6 (3.0) |
| *P* value |  | 0.03 | 0.01* | 0.08 | <0.01* |
| QIDS | 6.8 (3.9) | 5.1 (1.7) | 4.3 (3.2) | 5.7 (4.2) | 2.5 (1.4) |
| *P* value |  | 0.045 | 0.03 | 0.38 | <0.01* |
| CDRISC | 61.9 (9.2) | 60.8 (10.8) | 63.5 (7.8) | 66.8 (6.3) | 69.4 (6.6) |
| *P* value |  | 0.90 | 0.46 | 0.04 | 0.02 |
| PSS | 19.6 (4.7) | 17.3 (3.7) | 18.4 (2.7) | 18.2 (3.7) | 14.7 (4.0) |
| *P* value |  | 0.10 | 0.49 | 0.31 | 0.02 |
| RSES | 27.2 (2.9) | 27.3 (2.8) | 27.5 (3.6) | 28.0 (2.6) | 29.2 (2.4) |
| *P* value |  | 0.89 | 0.39 | 0.16 | <0.01* |
| EQ-5D-5L utility | 0.74 (0.12) | 0.78 (0.11) | 0.86 (0.11) | 0.84 (0.13) | 0.87 (0.11) |
| *P* value |  | 0.16 | 0.02 | <0.01* | <0.01* |
| HPQ (absolute presenteeism) | 61.8 (13.3) | 68.0 (10.3) | 64.4 (13.3) | 73.3 (11.2) | 78.0 (9.2) |
| *P* value |  | 0.19 | 0.67 | 0.13 | <0.01* |
| HPQ (relative presenteeism) | 0.98 (0.16) | 1.12 (0.23) | 1.13 (0.17) | 1.03 (0.20) | 1.17 (0.31) |
| *P* value |  | 0.14 | 0.10 | 0.46 | 0.12 |
| SCS (total) | 18.3 (2.8) | 17.5 (2.7) | 18.7 (2.7) | 19.8 (2.2) | 21.6 (1.8) |
| *P* value |  | 0.16 | 0.60 | 0.09 | <0.01* |
| SCS (Self-Kindness) | 3.5 (0.6) | 3.4 (0.6) | 3.9 (0.7) | 3.8 (0.5) | 4.2 (0.8) |
| *P* value |  | 0.59 | 0.25 | 0.23 | 0.01* |
| SCS (Self-Judgment) | 3.1 (0.8) | 3.1 (0.8) | 3.1 (0.6) | 3.3 (0.5) | 3.7 (0.5) |
| *P* value |  | 0.69 | 0.84 | 0.20 | 0.03 |
| SCS (Common Humanity) | 2.9 (0.8) | 2.6 (0.5) | 2.8 (0.7) | 3.1 (0.9) | 3.2 (0.7) |
| *P* value |  | 0.26 | 0.63 | 0.62 | 0.09 |
| SCS (Isolation) | 3.4 (0.9) | 3.2 (0.8) | 3.2 (0.8) | 3.4 (0.7) | 3.8 (0.6) |
| *P* value |  | 0.29 | 0.34 | 0.91 | 0.06 |
| SCS (Mindfulness) | 2.9 (0.6) | 2.6 (0.5) | 3.1 (0.5) | 3.3 (0.3) | 3.6 (0.5) |
| *P* value |  | 0.02 | 0.43 | 0.11 | <0.01* |
| SCS (Over-Identified) | 2.5 (0.7) | 2.5 (0.6) | 2.7 (0.5) | 3.0 (0.4) | 3.2 (0.6) |
| *P* value |  | 0.66 | 0.32 | <0.01* | 0.03 |

**(Continued) Table S2.** Secondary Clinical Outcomes except SWLS and FFMQ (mean (SD)) at Each Assessment Point with Comparison to Baseline (people with common mental disorders)

|  | Time | | | | |
| --- | --- | --- | --- | --- | --- |
|  | T1 | T2 | T3 | T4 | T5 |
| Scales | Baseline | 4 week | 8 week | 20 week | 32 week |
| MAIA (Noticing) | 3.2 (0.7) | 3.4 (0.6) | 3.5 (0.5) | 3.3 (0.5) | 3.6 (0.5) |
| *P* value |  | 0.26 | 0.25 | 0.77 | 0.18 |
| MAIA (Not-Distracting) | 2.2 (1.1) | 2.5 (0.6) | 2.8 (0.8) | 2.3 (0.9) | 2.9 (1.1) |
| *P* value |  | 0.19 | 0.03 | 0.74 | 0.06 |
| MAIA (Not-Worrying) | 2.4 (0.7) | 2.0 (0.6) | 2.5 (0.4) | 2.7 (1.1) | 2.7 (0.9) |
| *P* value |  | 0.04 | 0.55 | 0.53 | 0.34 |
| MAIA (Attention Regulation) | 2.6 (0.7) | 3.0 (0.4) | 3.1 (0.5) | 3.3 (0.5) | 3.6 (0.3) |
| *P* value |  | 0.08 | 0.03 | <0.01* | <0.01* |
| MAIA (Emotional Awareness) | 2.4 (0.7) | 3.3 (0.8) | 3.4 (0.5) | 3.4 (0.5) | 3.3 (0.3) |
| *P* value |  | <0.01* | <0.01* | <0.01* | <0.01* |
| MAIA (Self-Regulation) | 2.5 (1.0) | 3.2 (0.6) | 3.5 (0.6) | 3.4 (0.4) | 3.6 (0.5) |
| *P* value |  | 0.06 | 0.01* | 0.01* | <0.01* |
| MAIA (Body Listening) | 1.9 (0.9) | 2.5 (0.6) | 3.0 (0.5) | 3.2 (0.8) | 3.2 (0.6) |
| *P* value |  | 0.06 | <0.01* | <0.01* | <0.01* |
| MAIA (Trusting) | 2.5 (0.9) | 2.5 (0.7) | 2.9 (0.7) | 3.3 (0.7) | 3.4 (0.5) |
| *P* value |  | 0.96 | 0.18 | <0.01* | <0.01* |

All outcomes were analyzed on the basis of intent-to-treat, using a mixed-effects model repeated-measures approach.

Abbreviation: CD-RISC, the Connor-Davidson Resilience Scale; EQ-5D-5L, Five level EuroQoL-5 Dimensions; GAD7, Generalized Anxiety Disorder Questionnaire; MAIA, The Multidimensional Assessment of Interoceptive Awareness; PSS, Perceived Stress Scale; QIDS: Quick Inventory of Depressive Symptomatology; RSES, Rosenberg Self Esteem Scale; SCS: Self-Compassion Scale; HPQ, The World Health Organization Heath and Work Performance Questionnaire

*P value is less than .0125 (set by Bonferroni correction (.05/4))
